# Supplementary material for: Parallel analysis of ribonucleotide-dependent deletions produced by yeast Top1 in vitro and in vivo
Source: PubMed Central journal article supplement — Nucleic Acids Res. 2016 Jun 1;44(16):7714–21. doi: 10.1093/nar/gkw495 (PMC5027487; doi:10.1093/nar/gkw495), 2016-06-01
Supplement: supp_gkw495_nar-00494-h-2016-File008.pdf [file supp_gkw495_nar-00494-h-2016-File008.pdf]

**Table S1: Oligos used for *delitto perfetto***

| Relevant allele                                                                                                         | Oligo sequence corresponding to the coding (non-transcribed) strand of <i>pTET-lys2FΔA746NR</i>                                   |
|-------------------------------------------------------------------------------------------------------------------------|-----------------------------------------------------------------------------------------------------------------------------------|
| <i>pTET-lys2FΔA746NR</i> , (CCCTT) <sub>2</sub> <i>net-1</i><br>(detects 4-bp deletions when Top1 sites are 5-bp apart) | 5'-CGAGCTAGCT GAATCAATTC AAAGTTGCCA<br>AGCAT <u>CCCTT</u> CCCTTTGCAA GATCTGGAAA<br>GGAGGCCTCA GTTGTTCCGT TTGGCC                   |
| <i>pTET-lys2FΔA746NR</i> , (CCCTTCCTT)<br>(detects 4-bp deletions when Top1 sites are 4-bp apart)                       | 5'-TTGACGAGCT AGCTGAATCA ATTCAAAGTT<br>GCCAAGATCG CAT <u>CCCTTCC</u> TTTGCAAAGA<br>TCTGGAAAGG AGGCCTCAGT TGTTCCGTTT<br>GGCCTGTCTG |
| <i>pTET-lys2FΔA746NR</i> , (CCCTTTCCCTT)<br>(detects 7-bp deletions when Top1 sites are 7-bp apart)                     | 5'-TGACGAGCTA GCTGAATCAA TTCAAAGTTG<br>CCAAGATCGC AT <u>CCCTTTTC</u> CCTTTGCAAA<br>GATCTGGAAA GGAGGCCTCA GTTGTTCCGT<br>TTGGCCTGTC |
| <i>pTET-lys2FΔA746NR</i> , (CCCTT) <sub>3</sub><br>(detects 5-bp deletions)                                             | 5'-ACGAGCTAGC TGAATCAATT CAAAGTTGCC<br>AAGATCAGCA <u>TCCCTTCCCT</u> TCCCTTTGCA<br>AAGATCTGGA AAGGAGGCCT CAGTTGTTCC<br>GTTTGGCCTG  |

**Table S2. Deletion rates at the (CCCTT)<sub>2</sub> hotspot and derivatives**

| Repeat sequence                       | Relevant genotype               | Strain (SJR#) | Lys <sup>+</sup> rate x 10 <sup>-10</sup> (95% CI) | Deletion fraction | Deletion rate x 10 <sup>-10</sup> |
|---------------------------------------|---------------------------------|---------------|----------------------------------------------------|-------------------|-----------------------------------|
| (CCCTT) <sub>2</sub><br>5-bp deletion | <i>WT</i>                       | 3464          | 277<br>(222-351)                                   | 17/61             | 77.2                              |
|                                       | <i>rnh201Δ</i>                  | 3478          | 1360<br>(1250-1570)                                | 7/46              | 210                               |
|                                       | <i>rnh201Δ top1Δ</i>            | 3640          | 1070<br>(967-1440)                                 | 0/45              | <24                               |
|                                       | <i>rnh201Δ pol2-M644G</i>       | 3605          | 10100<br>(9510-11600)                              | 42/87             | 4880                              |
|                                       | <i>rnh201Δ pol2-M644G top1Δ</i> | 3628          | 2210<br>(1890-2500)                                | 0/36              | <61.4                             |
| CCCTTCCTT<br>4-bp deletion            | <i>WT</i>                       | 3747          | 830<br>(675-1080)                                  | 39/46             | 704                               |
|                                       | <i>rnh201Δ pol2-M644G</i>       | 4289          | 18000<br>(16500-19900)                             | 40/46             | 15700                             |
|                                       | <i>rnh201Δ pol2-M644G top1Δ</i> | 4290          | 1590<br>(1370-2020)                                | 0/48              | <33                               |
| CCCTTTCCCTT<br>7-bp deletion          | <i>WT</i>                       | 3749          | 233<br>(167-278)                                   | 1/45              | 5.18                              |
|                                       | <i>rnh201Δ pol2-M644G</i>       | 4291          | 4770<br>(4270-5500)                                | 6/150             | 191                               |
|                                       | <i>rnh201Δ pol2-M644G top1Δ</i> | 4292          | 2050<br>(1680-2250)                                | 0/64              | <32                               |
| (CCCTT) <sub>3</sub><br>5-bp deletion | <i>WT</i>                       | 3745          | 960<br>(771-1220)                                  | 42/46             | 877                               |
|                                       | <i>top1Δ</i>                    | 3773          | 387<br>(316-417)                                   | 19/46             | 160                               |
|                                       | <i>rnh201Δ</i>                  | 3746          | 3640<br>(3280-4270)                                | 16/47             | 12405                             |
|                                       | <i>rnh201Δ top1Δ</i>            | 3770          | 2180<br>(1590-2810)                                | 4/47              | 186                               |
|                                       | <i>rnh201Δ pol2-M644G</i>       | 4287          | 32200<br>(29200-35600)                             | 40/47             | 27400                             |
|                                       | <i>rnh201Δ pol2-M644G top1Δ</i> | 4288          | 5250<br>(4530-5830)                                | 3/46              | 342                               |
|                                       | <i>WT</i>                       | 3946          | 134<br>(94.7-171)                                  | 3/68              | 5.91                              |
| (CCCTT) <sub>2</sub><br>4-bp deletion | <i>rnh201Δ</i>                  | 3947          | 969<br>(886-1250)                                  | 1/78              | 14.9                              |
|                                       | <i>rnh201Δ pol2-M644G</i>       | 4778          | 3960<br>(3530-4210)                                | 0/105             | <38                               |
|                                       | <i>rnh201Δ pol2-M644G top1Δ</i> | 4779          | 1940<br>(1650-2460)                                | 0/104             | <19                               |

When no events were observed, rates were calculated assuming 1 event.

CI, 95% confidence interval

Figure S1

**A Wild type (CCCTT)<sub>2</sub>, N=61**

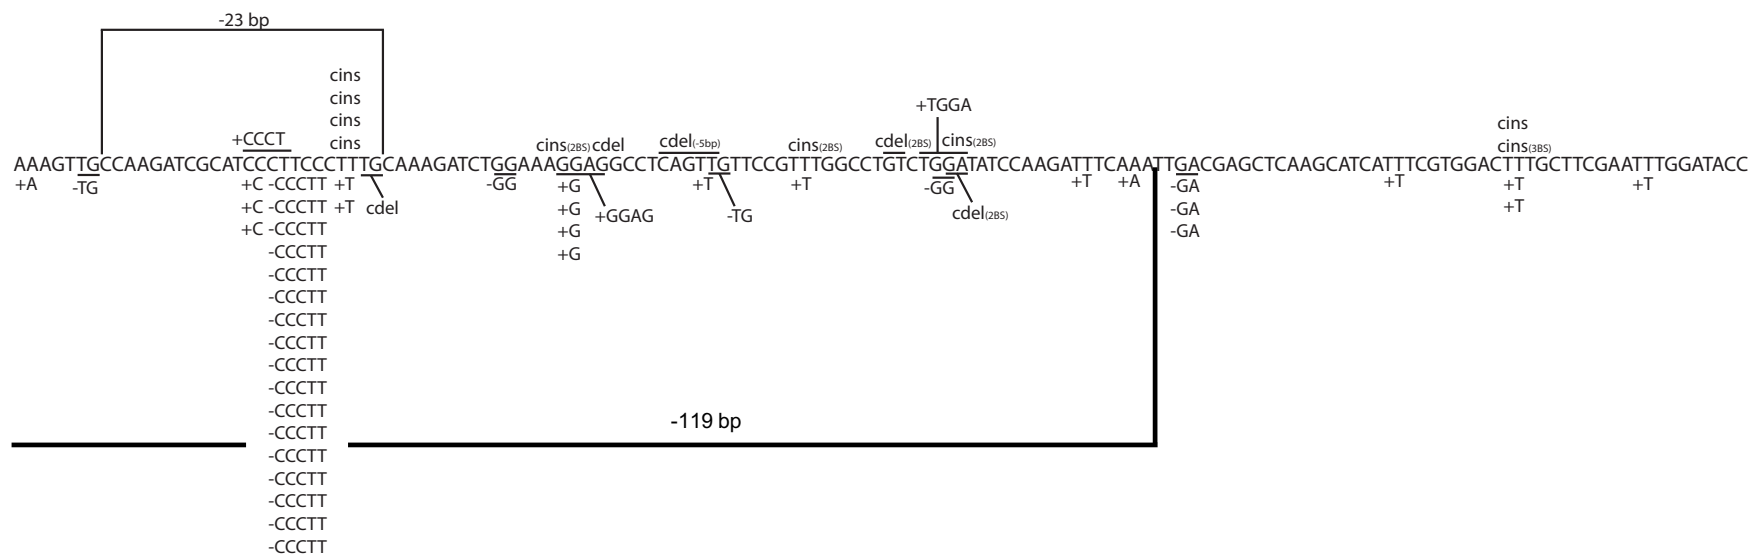

**B *rnh201*Δ(CCCTT)<sub>2</sub>, N=46**

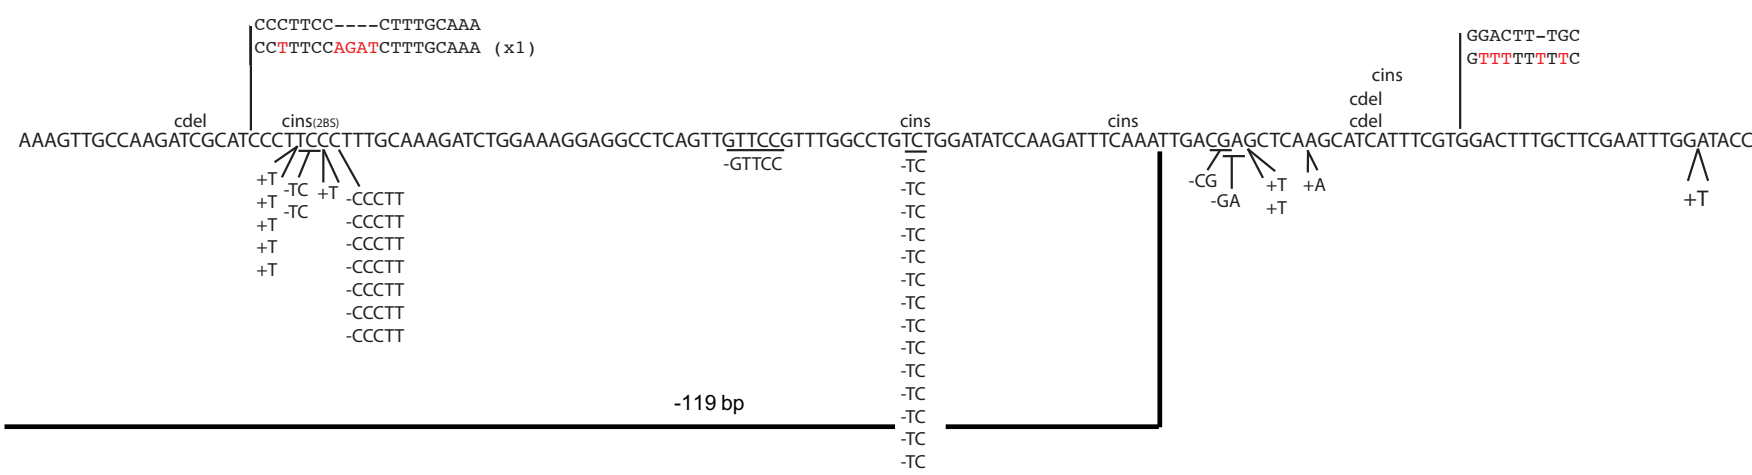

Figure S2

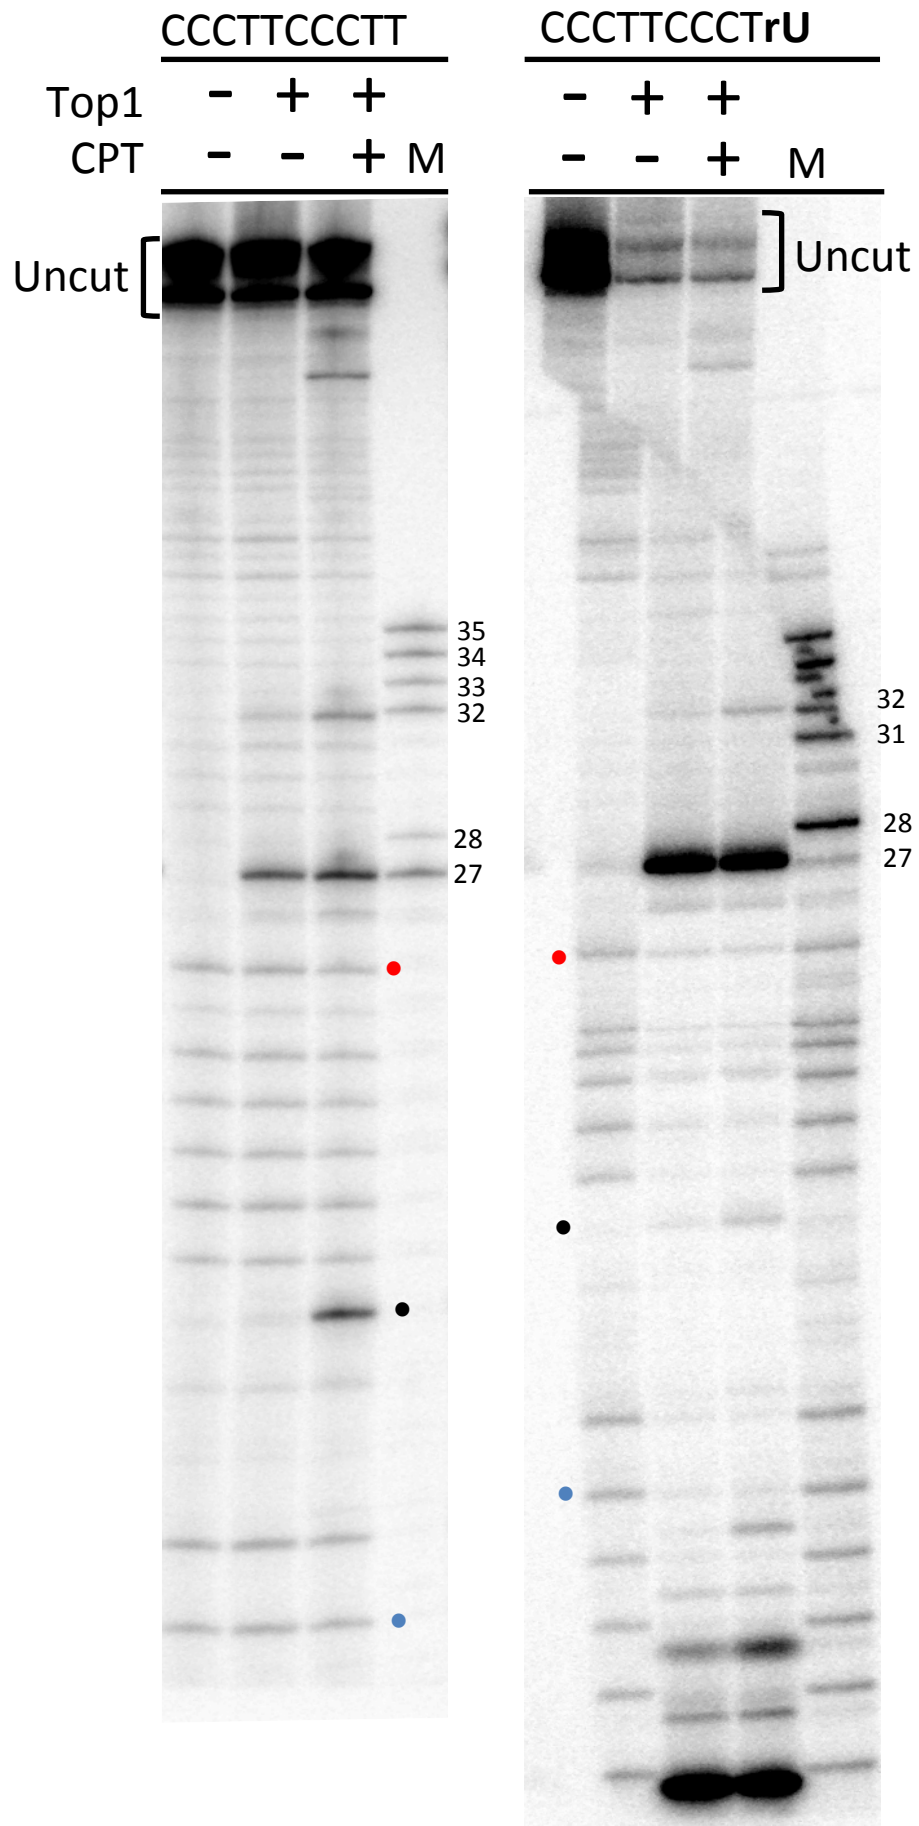

Figure S3

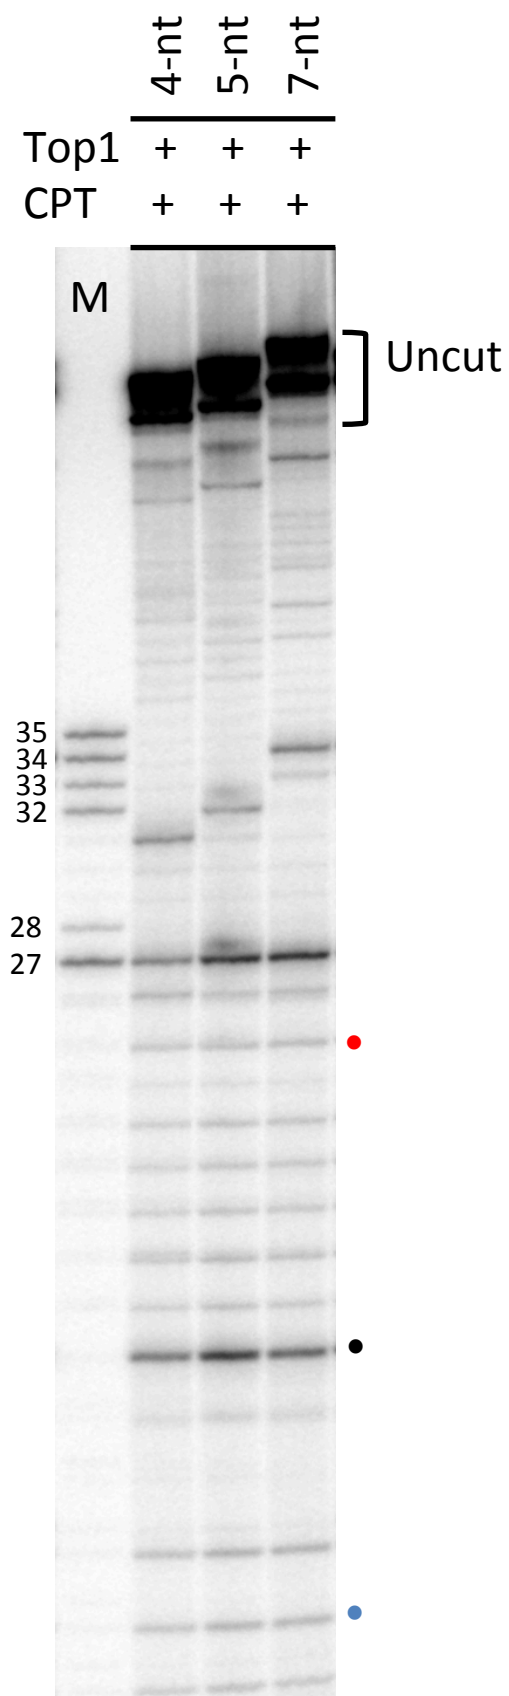

Figure S4

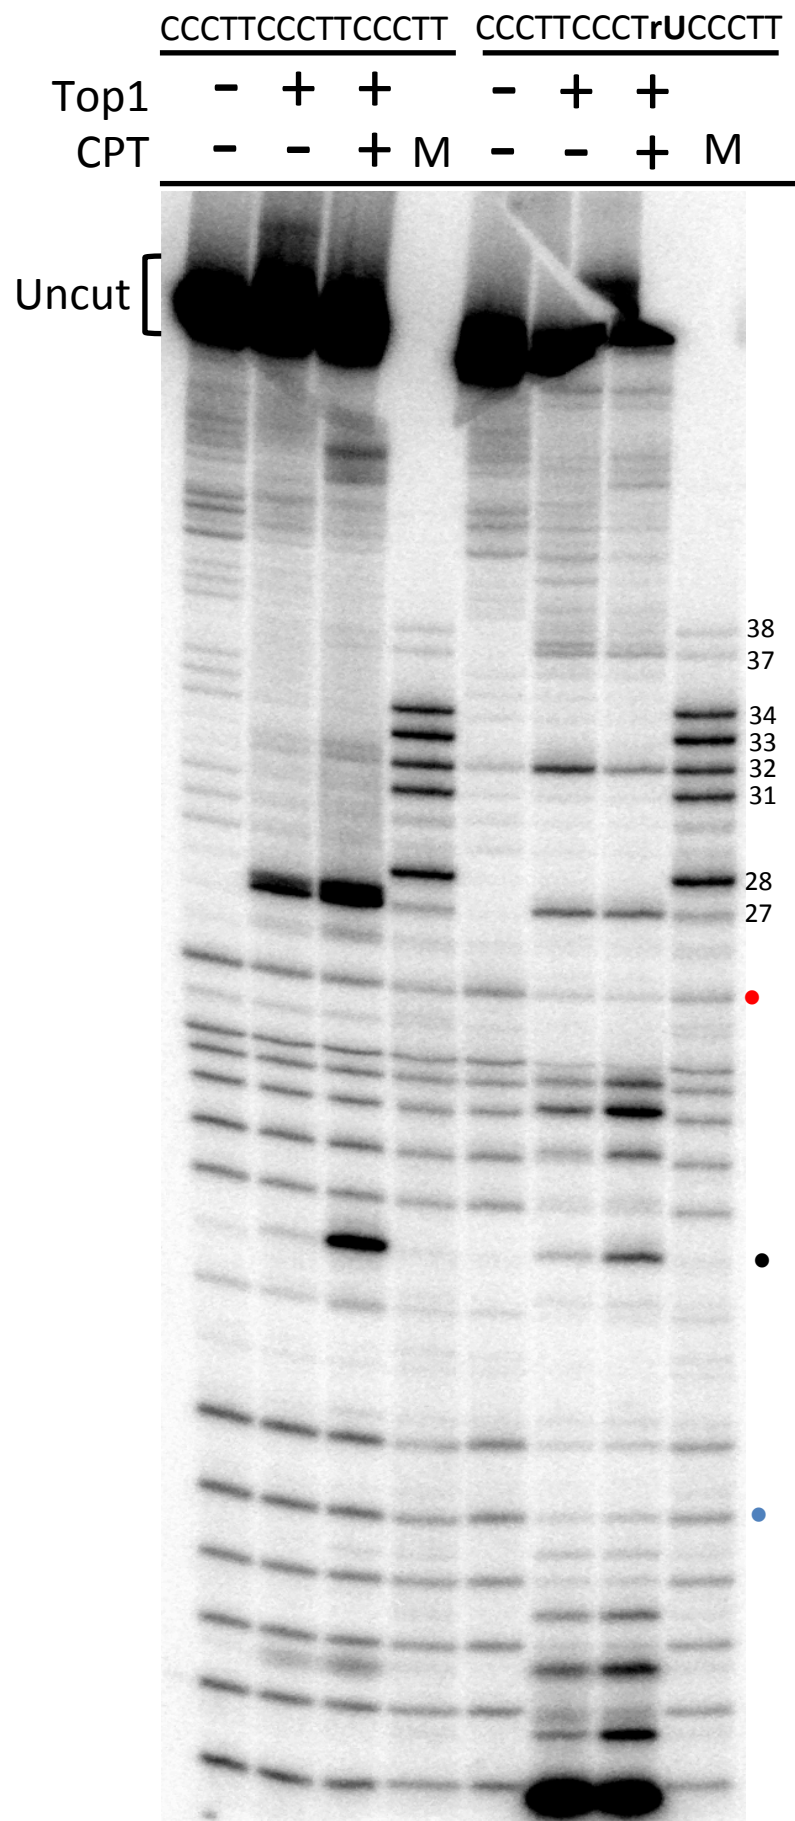

## SUPPLEMENTARY FIGURE LEGENDS

### **Figure S1: Mutation spectra of *pTET-lys2::(CCCTT)<sub>2</sub>* revertants in WT and *rnh201Δ***

**backgrounds.** A portion of the *pTET-lys2::(CCCTT)<sub>2</sub>* coding sequence is shown. "+" and "-" indicate small insertions and deletions, respectively, of the indicated bases. "cins" and "cdel" indicate complex insertion or deletions, respectively, where the selected frameshift is accompanied by a base substitution(s) within 10 bp. Deletions larger than 5 bp are indicated by a bracket. N, number of independent revertants sequenced.

### **Figure S2: Mapping of Top1 incision sites in (CCCTT)<sub>2</sub> and CCCTTCCCTrU.**

Shown are the original autoradiographs for the data in Figure 2C. As expected for relatively irreversible cleavage at rU, there is a decrease in uncut substrate and an increase in the 27-nt product with the CCCTTCCCTrU substrate. Red, black and blue dots indicate fragments of the same size on the two gels. The black dot indicates the position of a CPT-sensitive cleavage product. Uncut, intact substrate; M; size markers; CPT; camptothecin.

### **Figure S3: Mapping of Top1 incision sites in (CCCTT)<sub>2</sub>, CCCTTCCTT and**

**CCCTTTTCCCTT.** Shown are the original autoradiographs for the data in Figure 3A. Red, black and blue dots indicate fragments of the same size as in Figure S2. Uncut, intact substrate; M, size markers; CPT, camptothecin.

### **Figure S4: Mapping of Top1 incision sites in (CCCTT)<sub>3</sub> and CCCTTCCCTrUCCCTT.**

Shown are the original autoradiographs for the data in Figure 6B. Substitution of rU for the terminal thymine of the central repeat enhances the 37-nt and 32-nt cleavage products. Red, black and blue dots indicate fragments of the same size as in Figure S2. Uncut, intact substrate; M, size markers; CPT, camptothecin.
